# Supplementary material for: Synthesis, Characterization, and Cellular Uptake of a Glycylglycine Chelate of Magnesium
Source: PubMed Central journal article supplement (PMC8679001; doi:10.1021/acsomega.1c04146), 2021-11-30
Supplement: ao1c04146_si_001.pdf [file ao1c04146_si_001.pdf]

## Supplemental Information

### Synthesis, Characterization, and Cellular uptake of a Glycylglycine Chelate of Magnesium

Derek R. Case,<sup>†</sup> Ren Gonzalez,<sup>‡</sup> Jon Zubieta,<sup>†</sup> Robert P. Doyle<sup>†,\*</sup>

<sup>†</sup>111 College Place, Department of Chemistry, Syracuse University, Syracuse, New York, 13244, USA.

<sup>‡</sup>Balchem Corporation, 52 Sunrise Park Road, New Hampton, NY 10958, USA.

\* Correspondence: rpdoyle@syr.edu

#### Table of Contents

|                                                                                                |         |
|------------------------------------------------------------------------------------------------|---------|
| ESI Mass Spectrum of <b>1</b> (S1)                                                             | Page 2  |
| Full Spectra <sup>1</sup> H NMR of Glycylglycine (S2)                                          | Page 3  |
| <sup>1</sup> H NMR of <b>1</b> Full Spectra (S3)                                               | Page 4  |
| <sup>1</sup> H NMR Overlay of Glycylglycine and <b>1</b> (S4)                                  | Page 5  |
| <sup>1</sup> H NMR Overlay of Glycylglycine, <b>1</b> , Citric Acid and Magnesium Citrate (S5) | Page 6  |
| <sup>13</sup> C NMR of Glycylglycine (S6)                                                      | Page 7  |
| <sup>13</sup> C NMR Overlay of Glycylglycine and <b>1</b> (S7)                                 | Page 8  |
| <sup>13</sup> C NMR Overlay of Glycylglycine, <b>1</b> , and Magnesium Citrate (S8)            | Page 9  |
| Full Spectra HSQC of Glycylglycine and <b>1</b> (S9)                                           | Page 10 |
| Full Spectra HMBC of Glycylglycine and <b>1</b> (S10)                                          | Page 11 |
| Elemental Analysis and ICP of <b>1</b> (S11)                                                   | Page 12 |
| Linear Regression of Magnesium Uptake Standard (S12)                                           | Page 13 |

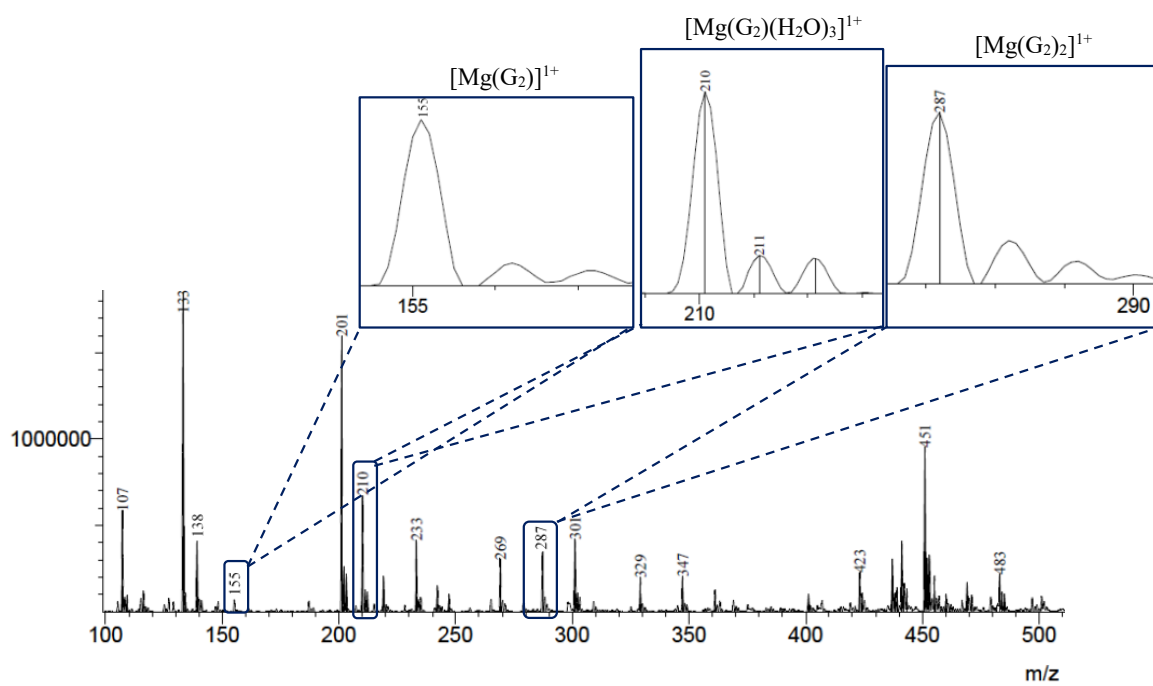

**Figure S1.** ESI-MS mass spectrum of **1** exhibiting an appropriate magnesium isotopic distribution pattern (IDP) and the presence of **1** along with an *in situ* formed 1:2 complex.

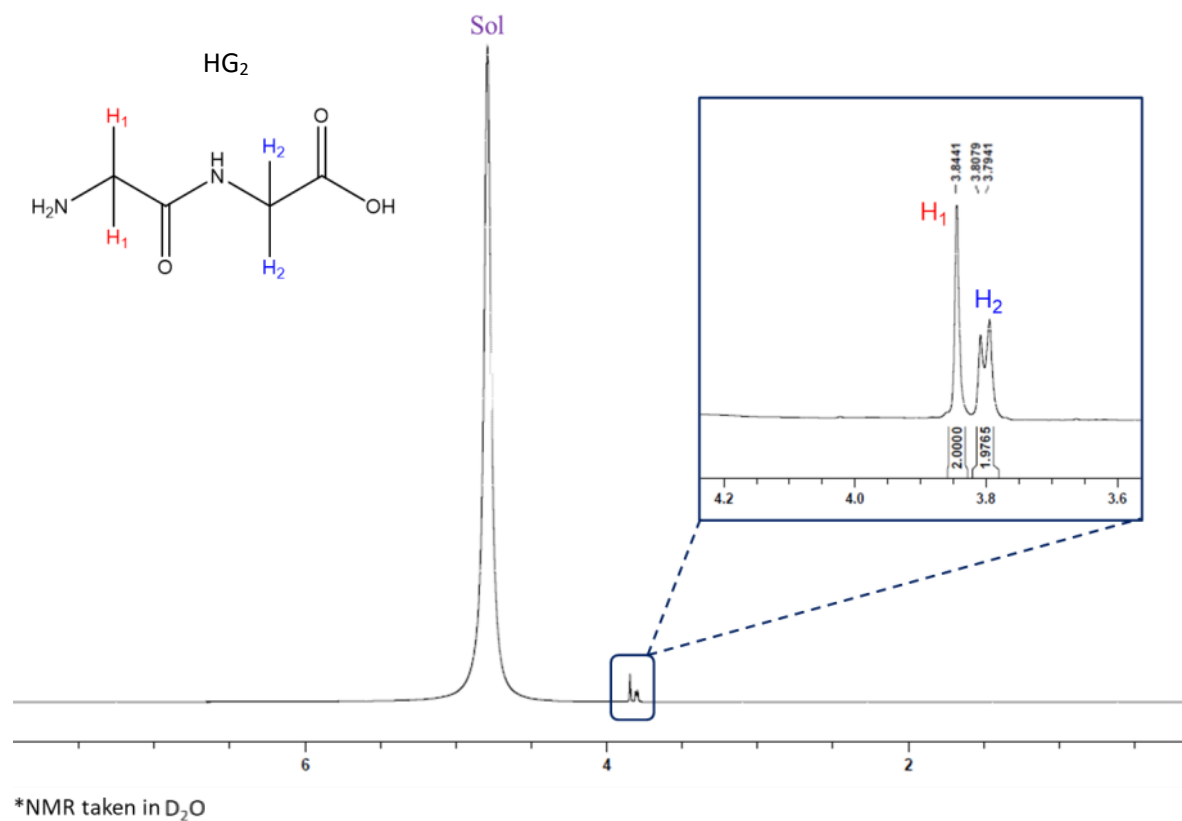

**Figure S2.** The full spectrum <sup>1</sup>H NMR of HG<sub>2</sub> showing a clean singlet and a signal with observed coupling – the observed integration coincides with the expected integration.

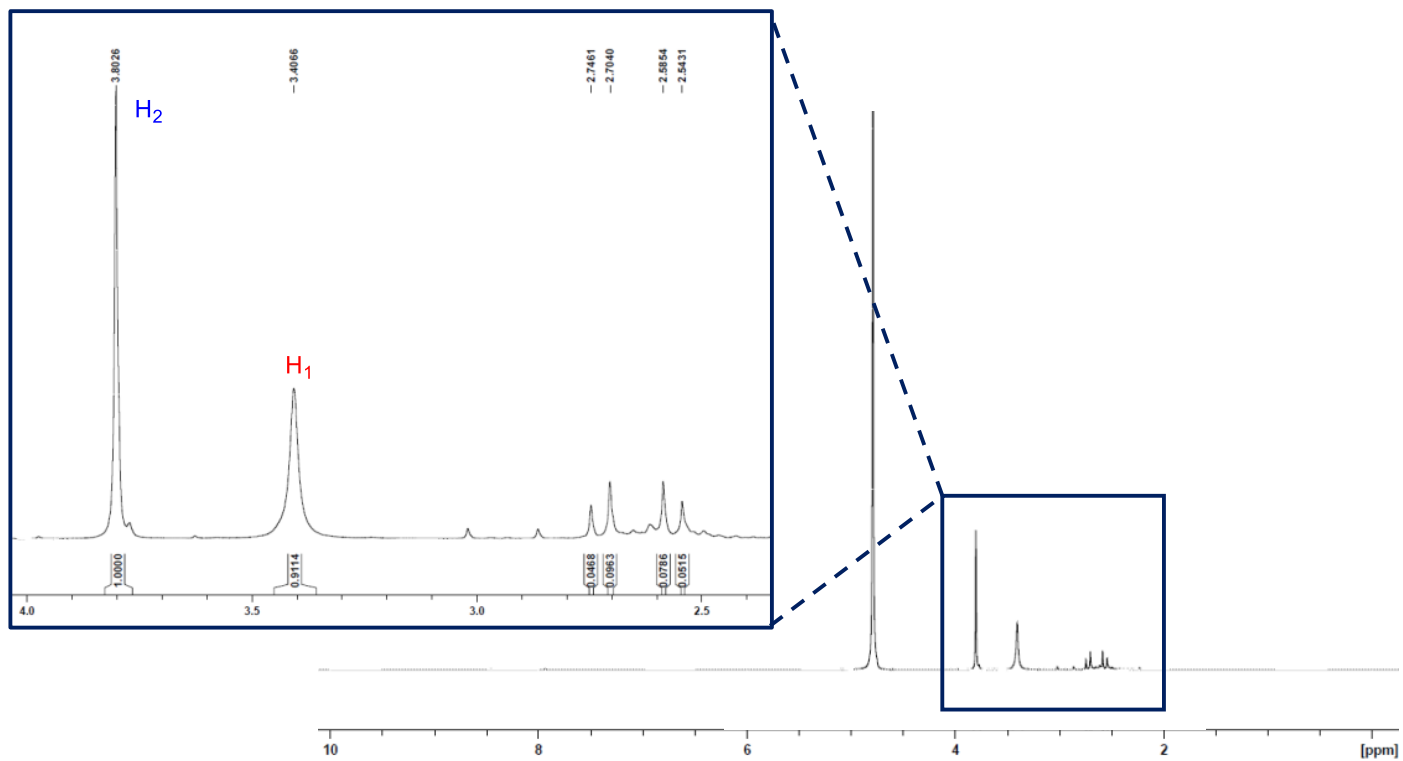

\*NMR taken in D<sub>2</sub>O

**Figure S3.** Full spectrum <sup>1</sup>H NMR of **1** showing two singlets and the presence of magnesium citrate. The observed integration coincides with the expected integration values.

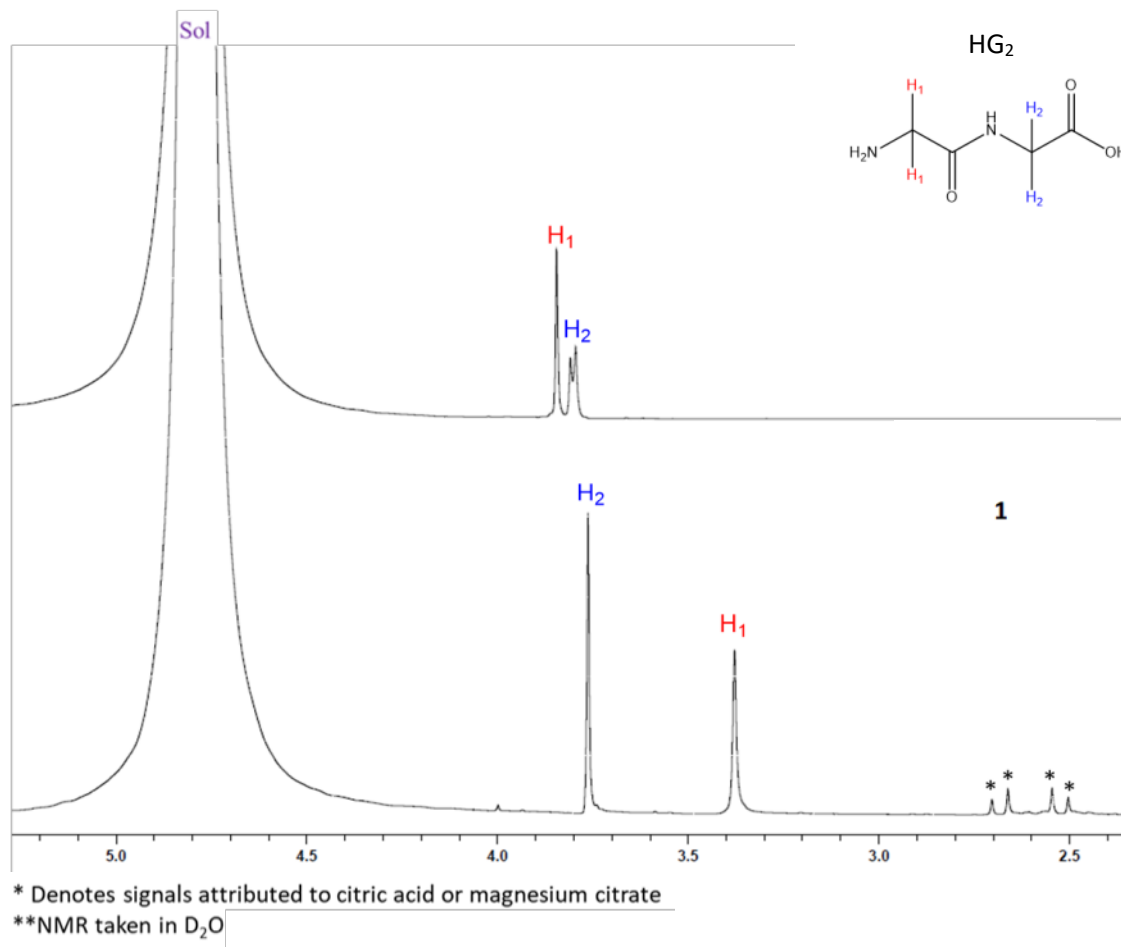

**Figure S4.** <sup>1</sup>H NMR spectra overlay of HG<sub>2</sub> (**Top**) and the **1** complex (**Bottom**) – the <sup>1</sup>H NMR spectrum of **1** shows the presence of magnesium citrate, but the desired integration is conserved between HG<sub>2</sub> and **1**. Observed coupling of the H<sub>2</sub> proton of HG<sub>2</sub> is no longer observed for **1**.

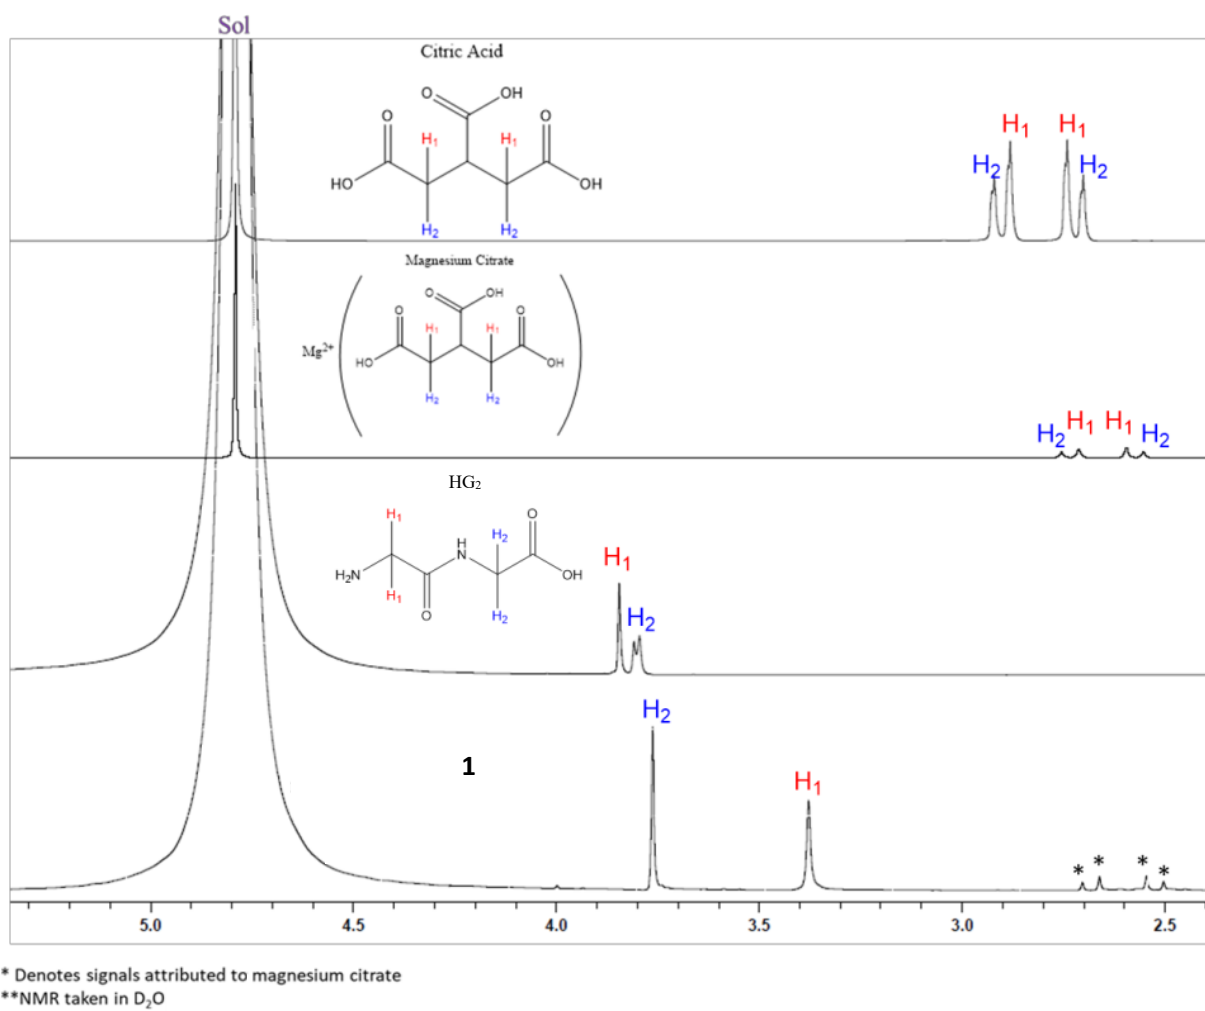

**Figure S5.** <sup>1</sup>H NMR spectra overlay for citric acid (**Top**), magnesium citrate (**Second from Top**), HG<sub>2</sub> (**Third from Top**), and **1** (**Bottom**). The integration is conserved between HG<sub>2</sub> and **1**, consistent with the formation of magnesium citrate.

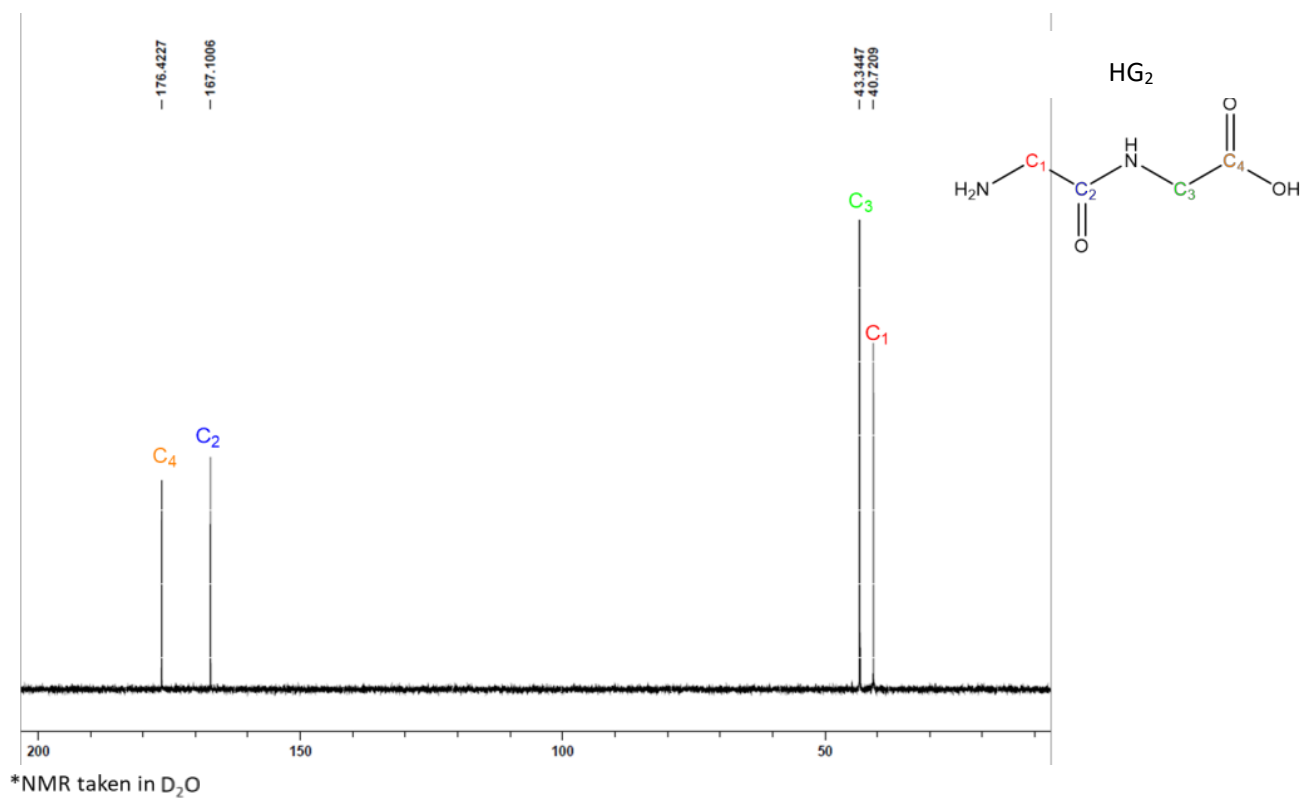

Figure S6. Full spectrum  $^{13}\text{C}$  NMR of  $\text{HG}_2$ .

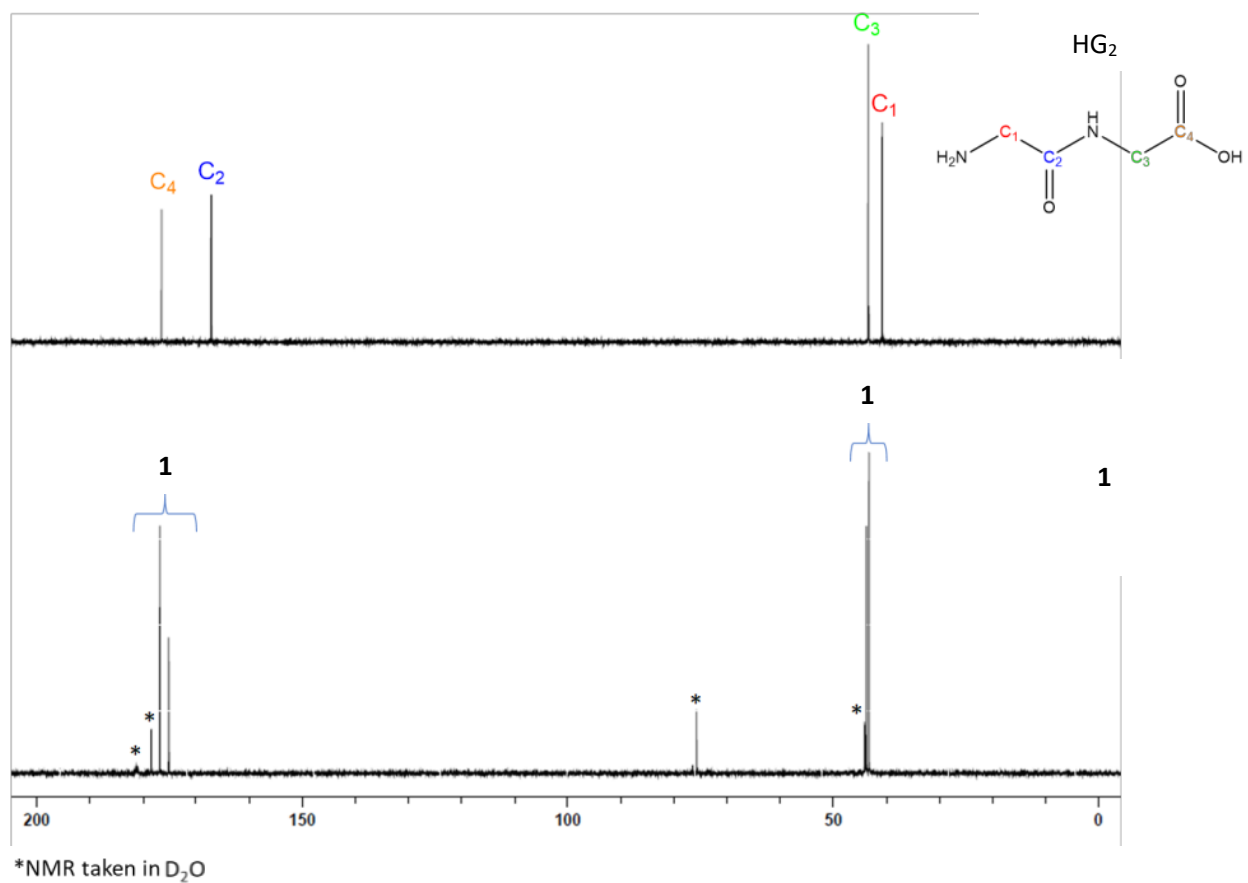

**Figure S7.** Full spectra  $^{13}\text{C}$  NMR overlay of  $\text{HG}_2$  (**Top**) and **1** (**Bottom**). **1** showed four signals attributed to magnesium citrate as marked by the asterisks, but the observation of four carbon signals attributed to  $\text{HG}_2$  are conserved.



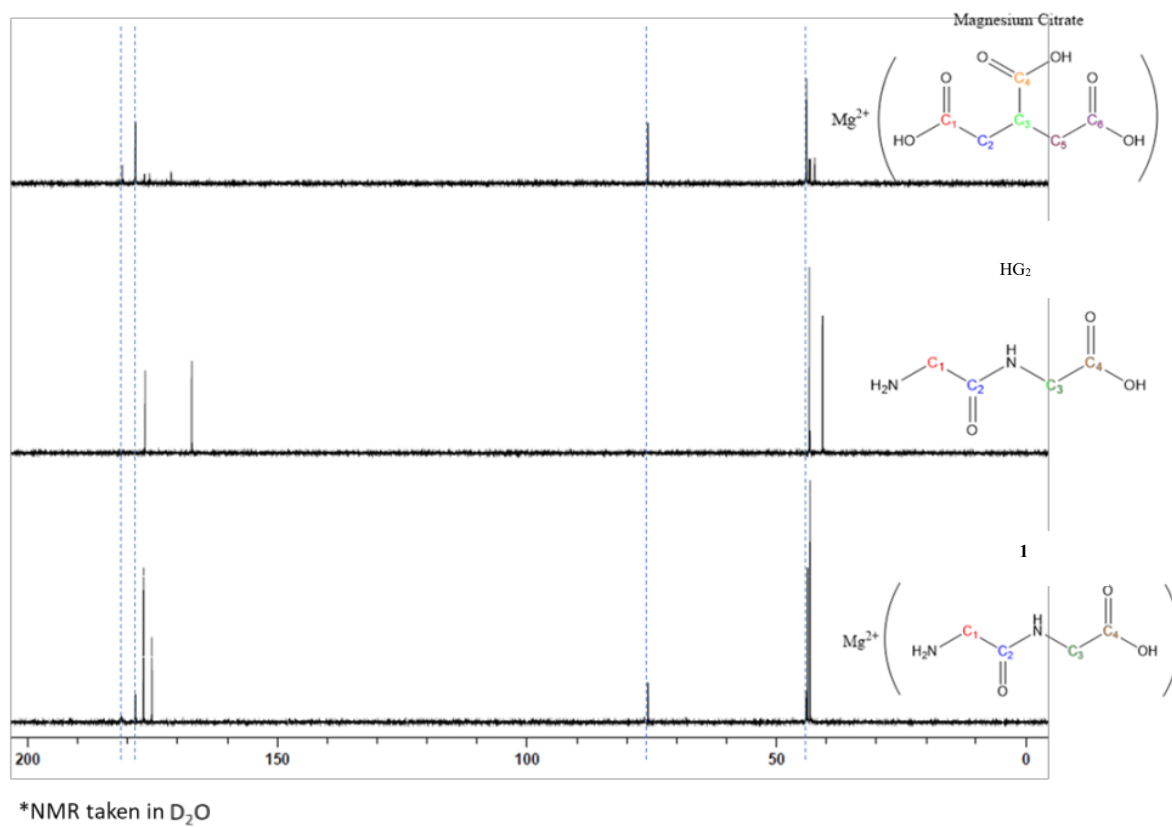

**Figure S8.** Full spectra  $^{13}\text{C}$  NMR overlay of magnesium citrate (**Top**),  $\text{HG}_2$  (**Middle**), and **1** (**Bottom**). The overlay illustrates the impurity observed in the spectra of **1** attributed to magnesium citrate, while the carbon signals attributed to  $\text{HG}_2$  are conserved.

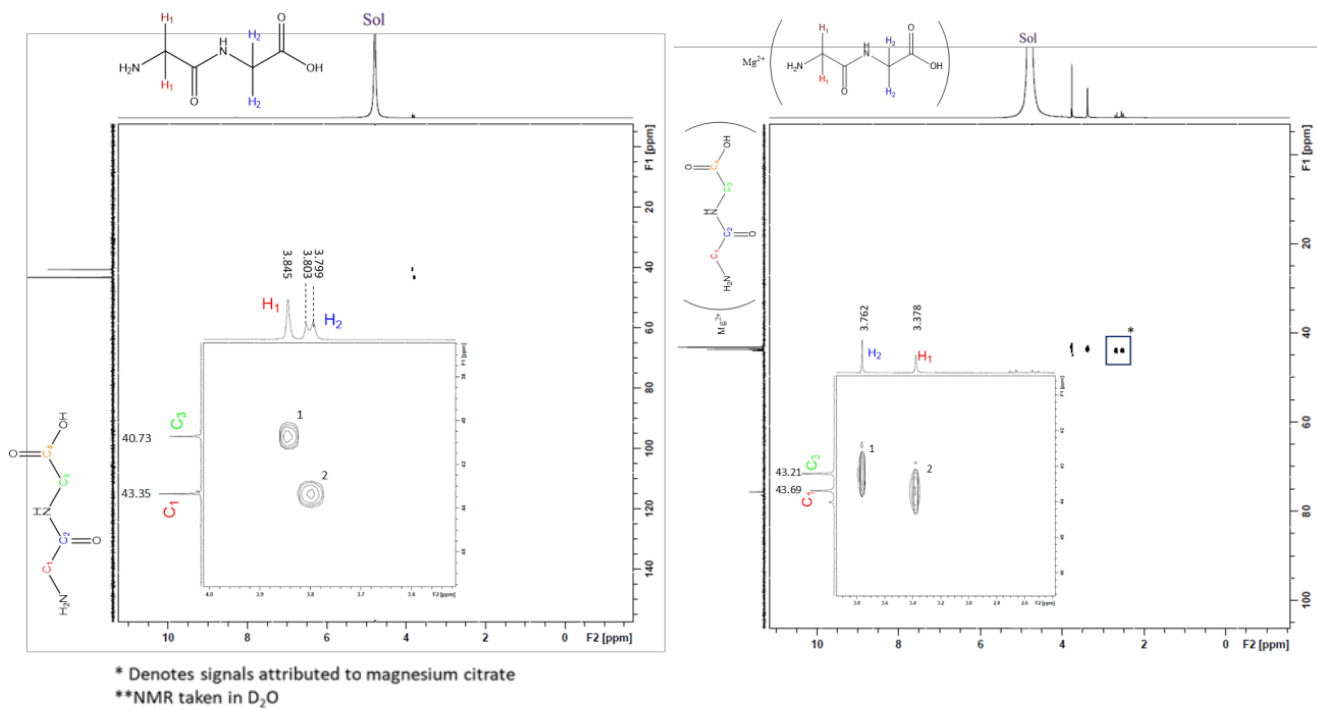

**Figure S9.** Full spectra HSQC of HG<sub>2</sub> (Left) and HSQC of **1** (Right) utilized to confirm the proton and carbon assignments of HG<sub>2</sub> and **1**.

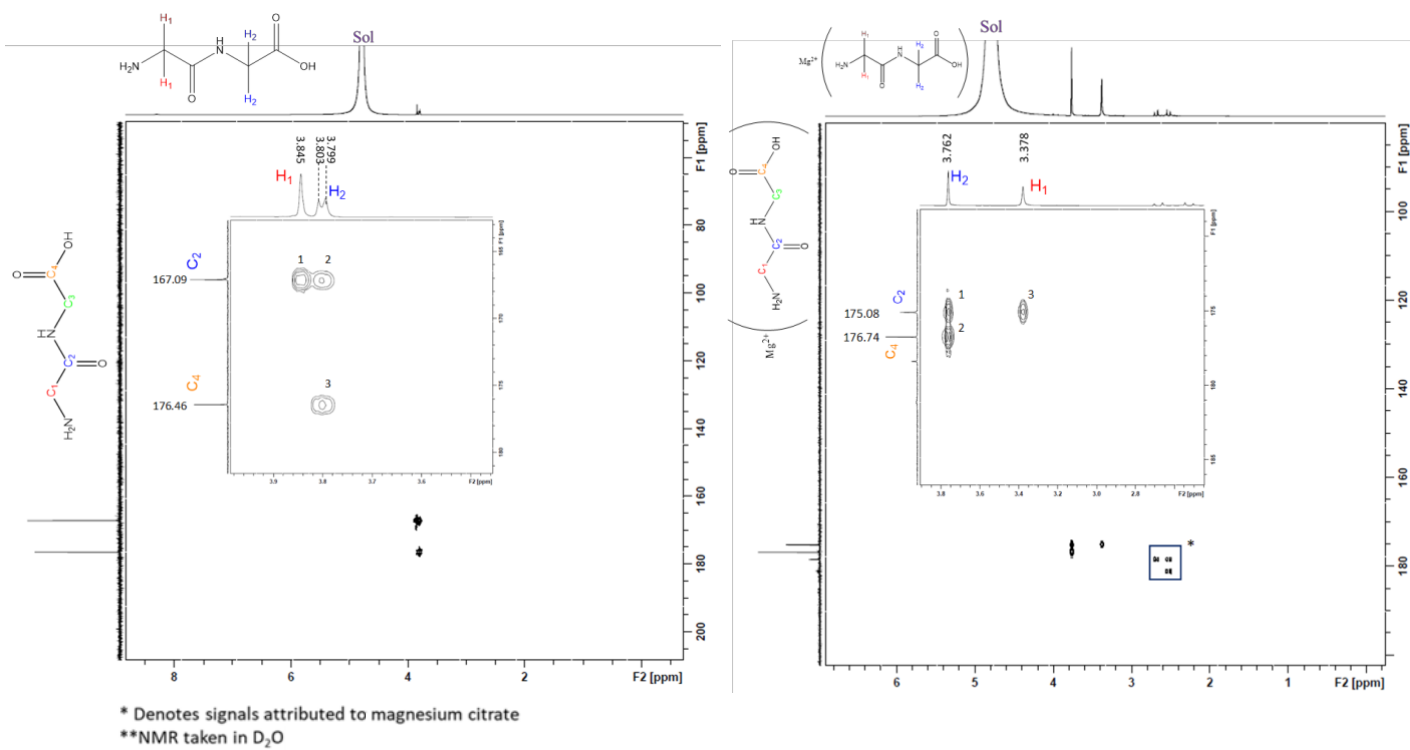

**Figure S10.** Full spectra HMBC of HG<sub>2</sub> (Left) and HMBC (Right) of **1** utilized to confirm the proton and carbon assignments of HG<sub>2</sub> and **1**.

**Analytical Report**  
Report Number: 185635  
Report Status: *Final*

| <b>Mg</b> | <b>N</b> |
|-----------|----------|
| 8.78 %    | 9.85 %   |
|           | 9.92 %   |

Figure S11. ICP analysis of 1.

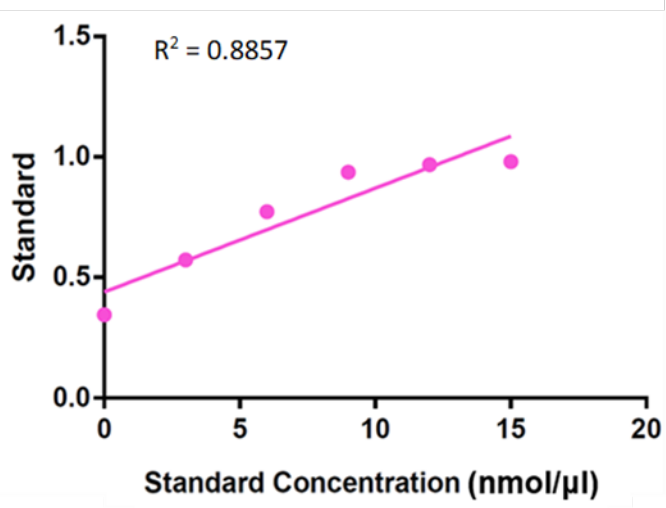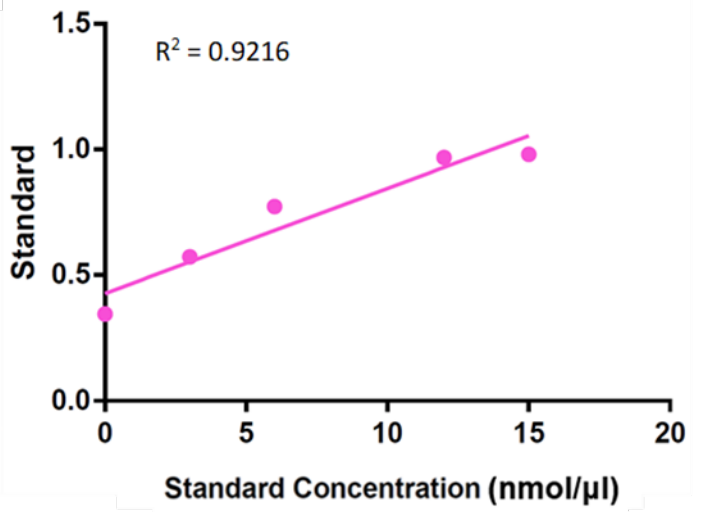

Figure S12. Plot of the linear regression of magnesium assay kit standard to confirm linearity.
